# Supplementary material for: Novel hierarchical CuNiAl LDH nanotubes with excellent peroxidase-like activity for wide-range detection of glucose
Source: Royal Society of Chemistry journal article supplement (doi:10.1039/d0dt03288c), 2020-11-21
Supplement: d0dt03288c1.pdf [file d0dt03288c1.pdf]

SUPPORTING INFORMATION

**Novel Hierarchical CuNiAl LDH Nanotubes with Excellent Peroxidase-Like  
Activity for Wide Range Detection of Glucose**

*Lihong Wu<sup>†,a,b</sup>, Xuechun Zhou<sup>†,a,b</sup>, Gengping Wan<sup>\*,a,b</sup>, Yulin Tang<sup>a,b</sup>, Shaohua Shi<sup>a,b</sup>, Xuefei Xu<sup>a</sup> and  
Guizhen Wang<sup>\*,a,b</sup>*

*<sup>a</sup>Key Laboratory of Advanced Materials of Tropical Island Resources (Hainan University), Ministry of  
Education, Haikou 570228, China.*

*<sup>b</sup>Institute of Advanced Electrical Materials, Qingdao University of Science and Technology, Qingdao  
266042, China.*

*<sup>†</sup>Joint first author*

**Corresponding Author**

*E-mail addresses: wangengping001@163.com (G. Wan); wangguizhen0@hotmail.com (G. Wang)*

## Table of Contents

|       |                                                                                                                                           |    |
|-------|-------------------------------------------------------------------------------------------------------------------------------------------|----|
| I.    | XPS survey spectrum of 100CuNiAl LDH.....                                                                                                 | S3 |
| II.   | SEM images of CuNiAl LDH prepared with different Cu salts.....                                                                            | S3 |
| III.  | SEM images of CuNiAl LDH prepared with different molar ratios (NH <sub>4</sub> NO <sub>3</sub> : Cu(NO <sub>3</sub> ) <sub>2</sub> )..... | S4 |
| IV.   | SEM images of CuNiAl LDH (Al <sub>2</sub> O <sub>3</sub> @NiC <sub>2</sub> O <sub>4</sub> as precursor).....                              | S4 |
| V.    | UV-vis absorption in different reaction system.....                                                                                       | S5 |
| VI.   | The UV-vis absorption spectra of 0.8 mM TMB mixed solutions in the absence or presence of scavengers (IPA).....                           | S5 |
| VII.  | Catalytic activity dependent on pH, temperature and concentration of catalyst .....                                                       | S6 |
| VIII. | BET of 100CuNiAl LDH.....                                                                                                                 | S6 |
| IX.   | Selectivity analysis for H <sub>2</sub> O <sub>2</sub> detection.....                                                                     | S7 |
| X.    | Results of the Glucose Detection in Fresh Juice.....                                                                                      | S7 |
| XI    | UV-vis absorbance changes at 652 nm of reusability experiments. ....                                                                      | S8 |

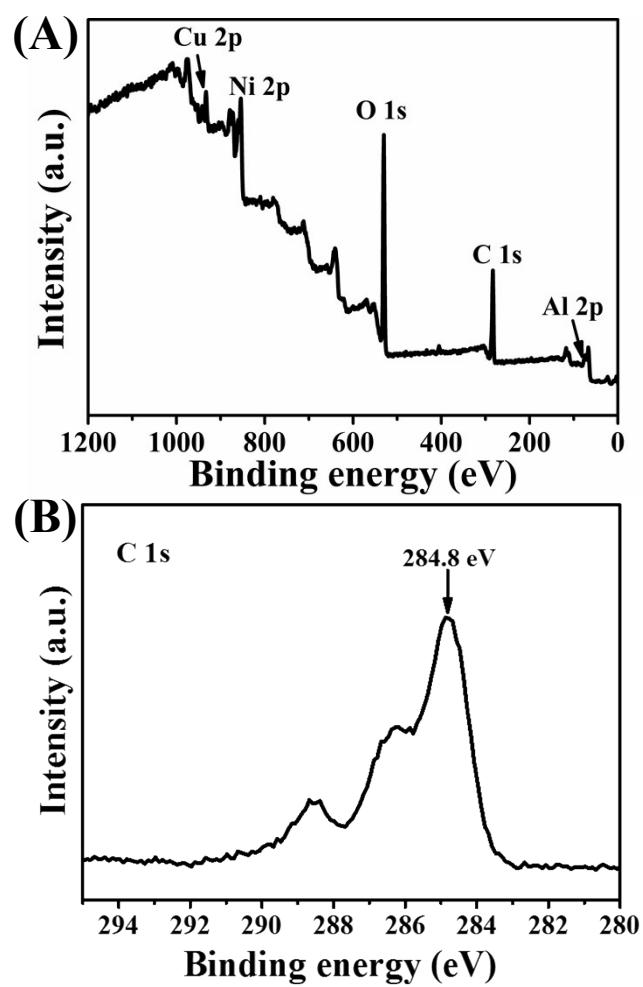

**Figure S1.** XPS survey spectrum of 100CuNiAl LDH. (B) XPS spectrum of C 1s.

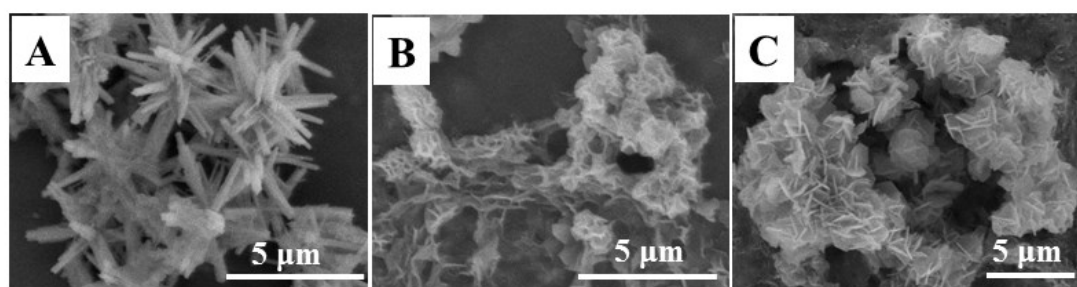

**Figure S2.** SEM images of CuNiAl LDH prepared with different Cu salts: (A) CuCl<sub>2</sub>, (B) Cu(OAc)<sub>2</sub> and (C) CuSO<sub>4</sub>.

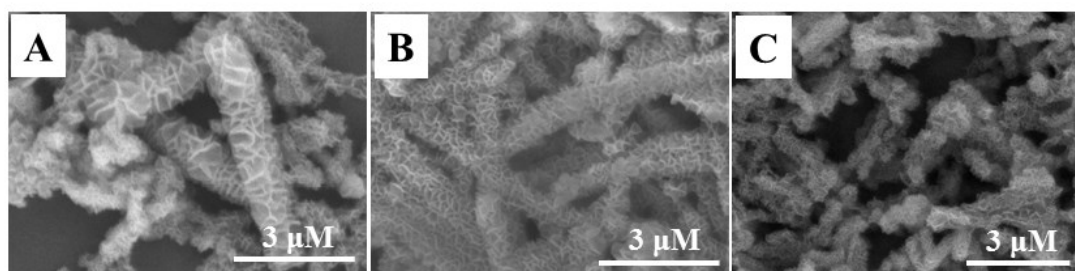

**Figure S3.** SEM images of CuNiAl LDH prepared with different molar ratios ( $\text{NH}_4\text{NO}_3 : \text{Cu}(\text{NO}_3)_2$ ): (A) 1 : 1, (B) 1 : 1.5 and (C) 1 : 2.

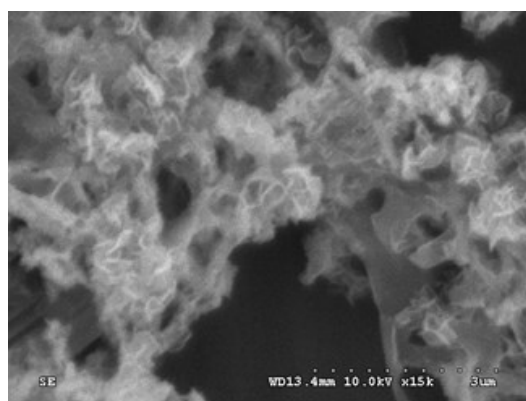

**Figure S4.** SEM images of CuNiAl LDH ( $\text{Al}_2\text{O}_3@ \text{NiC}_2\text{O}_4$  as precursor).

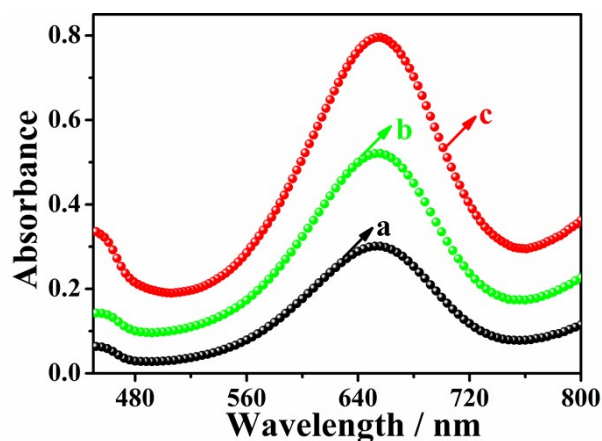

**Figure S5.** UV-vis absorption in different reaction system. (a)  $\text{H}_2\text{O}_2$  + TMB + 20CuNiAl-LDH; (b)  $\text{H}_2\text{O}_2$  + TMB + 50CuNiAl-LDH; (c)  $\text{H}_2\text{O}_2$  + TMB + 100CuNiAl-LDH. Reaction conditions: 0.8 mM TMB,  $50 \mu\text{g mL}^{-1}$  catalyst, 4 mM  $\text{H}_2\text{O}_2$  in 20 mM PBS incubated at  $55^\circ\text{C}$  for 30 min.

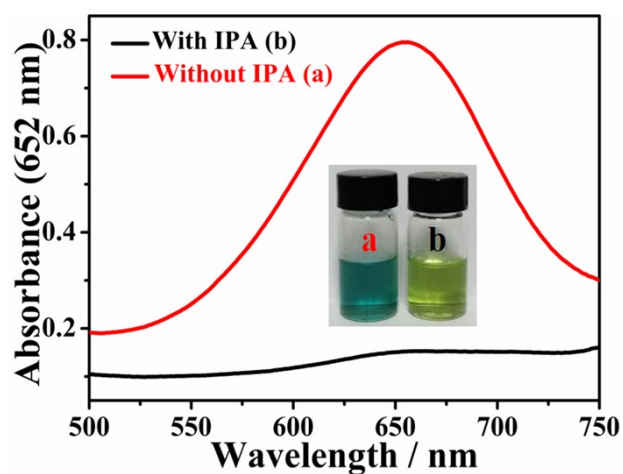

**Figure S6.** The UV-vis absorption spectra of 0.8 mM TMB mixed solutions in the absence or presence of scavengers (IPA). The inset is the photograph of the related color changes.

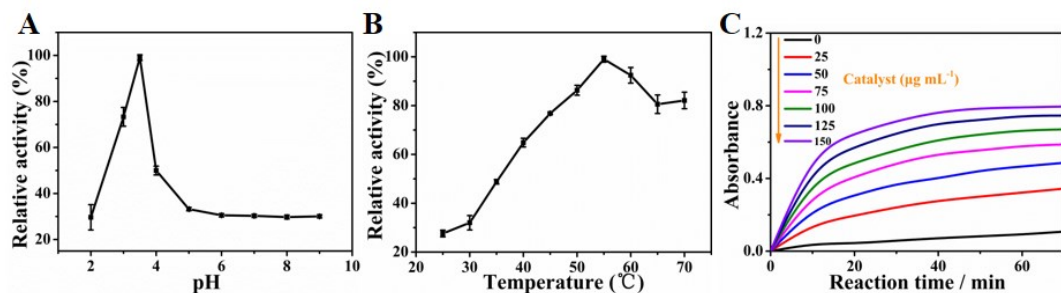

**Figure S7.** The dependence of peroxidase-like catalytic activities of (A) pH, (B) temperature and (C) concentration of catalyst.

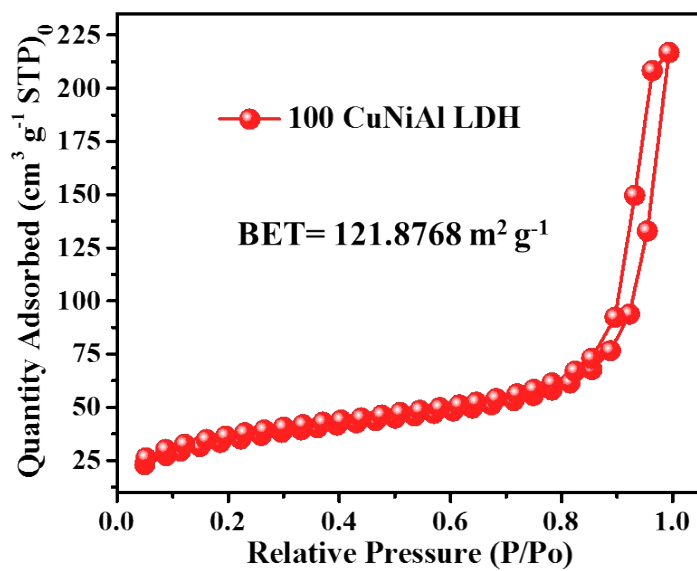

**Figure S8.** BET of 100CuNiAl LDH.

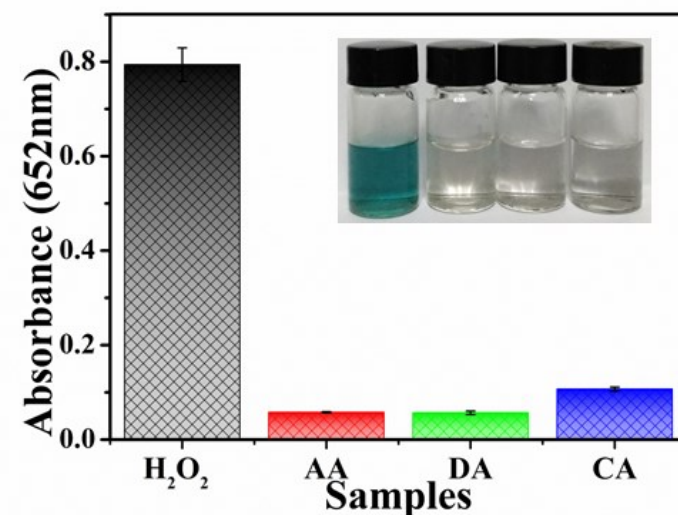

**Figure S9.** Selectivity analysis for 4 mM H<sub>2</sub>O<sub>2</sub> detection, L-ascorbic (AA), dopamine hydrochloride (DA) and citric acid (CA) as the control group.

**Table S1.** Results of the Glucose Detection in Fresh Juices.

| Original amount (μM) | Added (μM) | Found (μM) | Recovery (%) | RSD (%) |
|----------------------|------------|------------|--------------|---------|
| 196.88               | 40         | 236.02     | 97.85        | 6.43    |
| 137.45               | 40         | 179.19     | 104.35       | 7.08    |
| 110.15               | 40         | 149.78     | 99.07        | 3.17    |

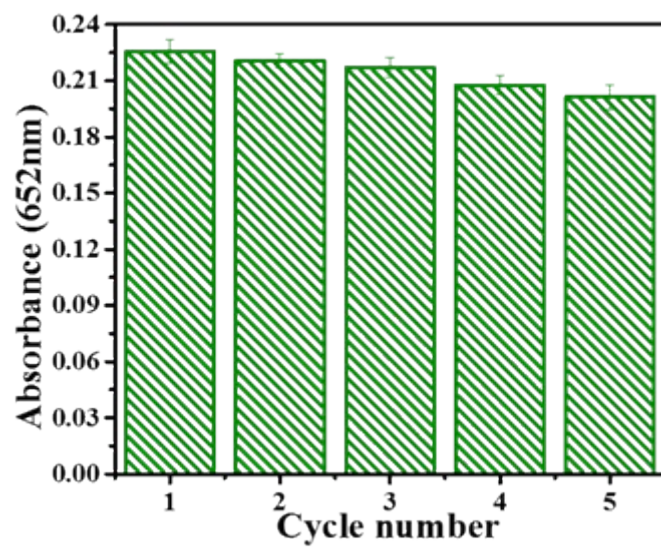

**Figure S10.** UV-vis absorbance changes at 652 nm of reusability experiments.
